# Supplementary material
Source: publisher figshare collection journal article supplement (https://gsapubs.figshare.com/articles/dataset/_/21598512)
Supplement: Supplementary file 1 [file 1]

Gabriel S. Santos, Jean Bédard, Cees R. van Staal, Shoufa Lin, Tong Hong, and Kai Wang, 2022, Geology of the Liuyuan Complex, NW China: A Permian back-arc basin ophiolite at the southern edge of the Central Asian orogenic belt: GSA Bulletin, <https://doi.org/10.1130/B36736.1>.

## Supplemental Material

**Table S1.** Geochemistry.

**Table S2.** Mineral chemistry.

**Table S3.** Geochronology.
